# Supplementary material for: Spectrofluorimetric determination of Hg2+ and Pb2+ using acetylcholinesterase (AChE)-based formation of silver nanoparticles
Source: Royal Society of Chemistry journal article supplement (doi:10.1039/c6ra00193a), 2016-01-01
Supplement: c6ra00193a1.pdf [file c6ra00193a1.pdf]

Electronic Supplementary Information (ESI)

**Spectrofluorimetric determination of Hg<sup>2+</sup> and Pb<sup>2+</sup> using**

**Acetylcholinesterase (AChE)-based formation of silver nanoparticles**

D. Nanda Kumar, Jaydeep Roy, S. A. Alex, N. Chandrasekaran, A. Mukherjee\*

Centre for Nanobiotechnology, VIT University, Vellore, India

**\*Corresponding author**

**Dr. Amitava Mukherjee**

**Senior Professor & Deputy Director**

**Centre for Nanobiotechnology**

**VIT University, Vellore - 632014**

**Email: [amit.mookerjea@gmail.com](mailto:amit.mookerjea@gmail.com), [amitav@vit.ac.in](mailto:amitav@vit.ac.in)**

**Phone: 91 416 2202620**

**Fax: 91-416-2243092**

25 **Fig. S1.** Photograph of AgNPs formed during addition of (A) AChE (4 mU), ATCh (1 mM),  
 26 AgNO<sub>3</sub> (0.1 mM), NaBH<sub>4</sub> (1 mM), and (B) in presence of Hg<sup>2+</sup> (10×10<sup>-13</sup> M).

27

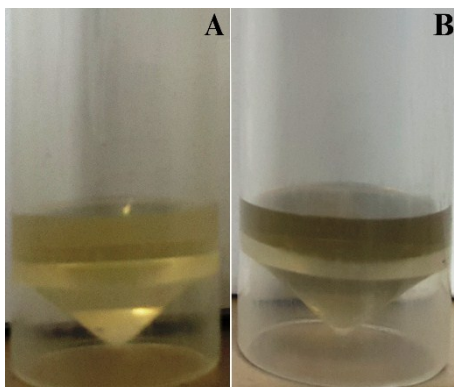

28

29

30

31 **Fig. S2.** Hydrodynamic size distribution for AgNPs formed in presence of (A) AgNO<sub>3</sub> (0.1  
 32 mM) and NaBH<sub>4</sub> (1 mM). (B) AgNO<sub>3</sub> (0.1 mM), NaBH<sub>4</sub> (1 mM), AChE (4 mU), and ATCh  
 33 (1 mM). (C) After the addition of Hg<sup>2+</sup> (10×10<sup>-13</sup> M), and (D) Pb<sup>2+</sup> (1×10<sup>-9</sup> M) to the system,  
 34 respectively.

35

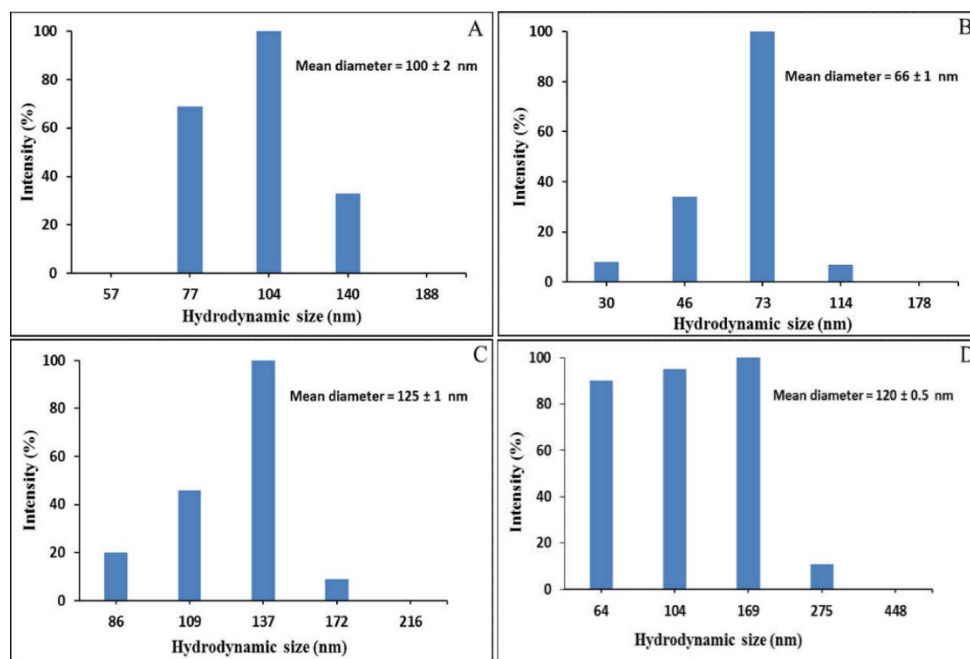

36

37 **Fig. S3.** UV-visible spectra for optimization of AgNPs formed during the addition of (A)  
38 different concentrations of AgNO<sub>3</sub> (0.1, 0.01, and 0.001 mM) and fixed concentration of  
39 NaBH<sub>4</sub> (1 mM), (B) different concentrations of NaBH<sub>4</sub> (1.0, 0.1, and 0.001 mM) and fixed  
40 concentration of AgNO<sub>3</sub> (0.1 mM). The control has AgNO<sub>3</sub> (0.1 mM), NaBH<sub>4</sub> (1 mM),  
41 AChE (4 mU), and ATCh (1 mM).

42

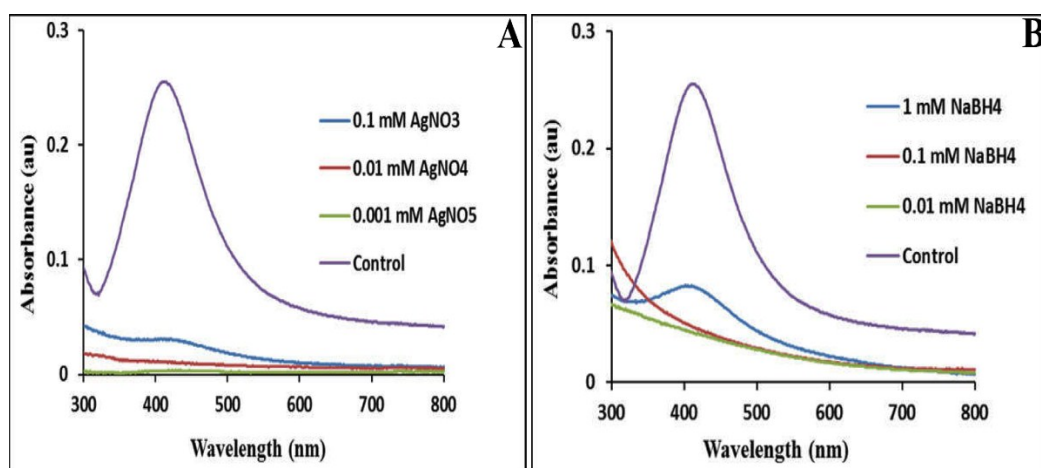

43
